# Supplementary material for: Differential changes in end organ immune cells and inflammation in salt-sensitive hypertension: effects of increasing M2 macrophages
Source: PubMed Central journal article supplement (PMC11250104; doi:10.1042/cs20240699), 2024-07-16
Supplement: CS-2024-0699_supp.pdf [file CS-2024-0699_supp.pdf]

## DATA SUPPLEMENT

### **Differential Changes in End Organ Immune Cells and Inflammation in Salt-Sensitive Hypertension: Effects of Increasing M2 Macrophages**

#### **Authors and Affiliations**

Shobana Navaneethabalakrishnan, Bethany L. Goodlett, Hannah L. Smith, Alyssa Cardenas, Asia Burns, Brett M. Mitchell

Department of Medical Physiology, Texas A&M University College of Medicine, Bryan, TX, U.S.A.

#### **Corresponding Author**

Brett M. Mitchell, PhD, ORCID: 0000-0002-2575-8761, [brettmitchell@tamu.edu](mailto:brettmitchell@tamu.edu), 8447 Riverside Parkway, Medical Research Education Building II, Bryan, Texas, 77807, USA;  
Tel: +1 979 436 0751

#### **Competing Interests**

The authors declare that there are no competing interests associated with the manuscript.

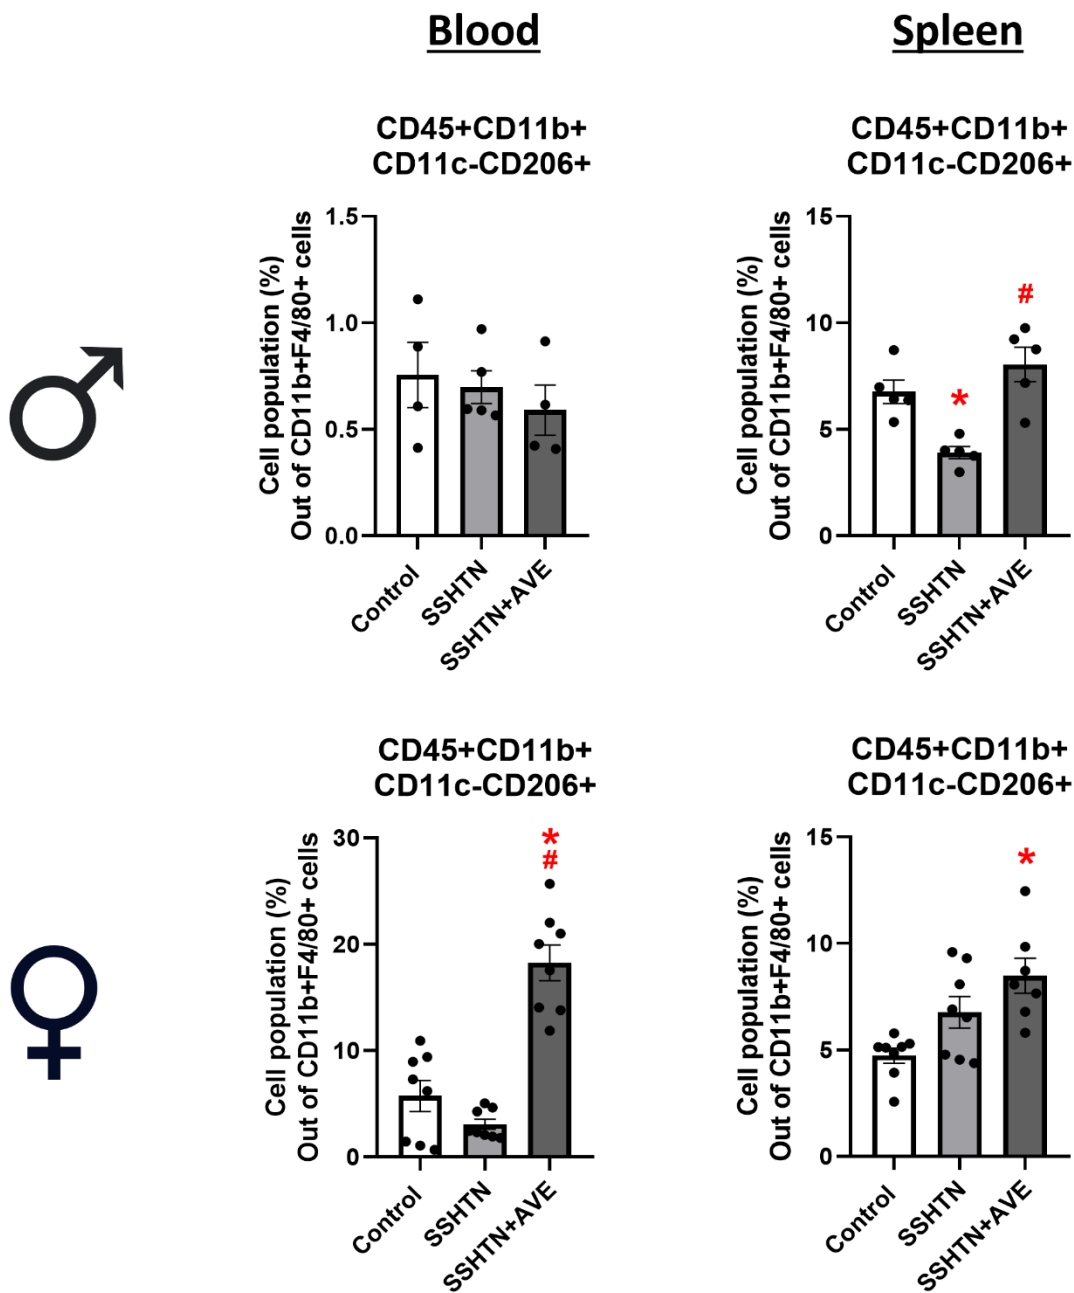

**Supplemental Figure 1. AVE0991 treatment mostly increased M2 macrophages in the blood and spleens of male and female mice with SSHTN.** Flow cytometric data examining renal populations of M2 macrophages in control, SSHTN, and SSHTN+AVE male and female mice. Each cell population is shown as a percentage of its respective parent population. Results are presented as mean  $\pm$  SEM and statistical analyses were performed with one-way ANOVA ( $n=4-6$  per group). \* $P<0.05$  vs control mice and # $P<0.05$  vs SSHTN mice.

Online Table 1. Flow cytometry antibody panel descriptions for mouse kidneys and gonads.

| Innate Immune Cells                 |                                         |                                   |                                    |                                  |              |
|-------------------------------------|-----------------------------------------|-----------------------------------|------------------------------------|----------------------------------|--------------|
| Fluorochrome                        | BV421                                   | FITC                              | APC                                | BV480                            | BV785        |
| Antigen                             | CD45.2                                  | CD11b                             | CD11c                              | F4/80                            | CD206        |
| Final Conc (µg/mL)                  | 2 (kidney & ovary)<br>4 (testis)        | 5 (kidney & ovary)<br>10 (testis) | 2 (kidney & ovary)<br>4 (testis)   |                                  |              |
| Dilution Factor                     | 1:100 (kidney & ovary)<br>1:50 (testis) |                                   |                                    |                                  |              |
| Clone                               | 104                                     | M1/70                             | N418                               | T45-2342                         | C068C2       |
| Manufacturer                        | BD                                      | BioLegend                         | BioLegend                          | BD                               | BioLegend    |
| Natural Killer Cells                |                                         |                                   |                                    |                                  |              |
| Fluorochrome                        | Pacific Blue                            |                                   | BV570                              | APC-Fire810                      |              |
| Antigen                             | CD3e                                    |                                   | CD161                              | CD19                             |              |
| Final Conc (µg/mL)                  | 2 (kidney & ovary)<br>4 (testis)        |                                   | 1.5 (kidney & ovary)<br>3 (testis) | 2 (kidney & ovary)<br>4 (testis) |              |
| Dilution Factor                     | 1:100 (kidney & ovary)<br>1:50 (testis) |                                   |                                    |                                  |              |
| Clone                               | 500A2                                   |                                   | PK136                              | 6D5                              |              |
| Manufacturer                        | BD                                      |                                   | BioLegend                          | BioLegend                        |              |
| CD4-Lineage T Cells                 |                                         |                                   |                                    |                                  |              |
| Fluorochrome                        | PE-Vio615                               |                                   |                                    | PE-Cy7                           |              |
| Antigen                             | CD4                                     |                                   |                                    | CD25                             |              |
| Final Conc (µg/mL)                  | 1.5 (kidney & ovary)<br>3 (testis)      |                                   |                                    | 2 (kidney & ovary)<br>4 (testis) |              |
| Dilution Factor                     | 1:100 (kidney & ovary)<br>1:50 (testis) |                                   |                                    |                                  |              |
| Clone                               | REA1211                                 |                                   |                                    | PC61                             |              |
| Manufacturer                        | BioLegend                               |                                   |                                    | BioLegend                        |              |
| CD4-Lineage T Cells (Intracellular) |                                         |                                   |                                    |                                  |              |
| Fluorochrome                        | BV605                                   | BV711                             | AlexaFluor 700                     | PerCP-eFluor710                  | APC-Cy7      |
| Antigen                             | IFNγ                                    | IL4                               | FoxP3                              | TNFα                             | IL17a        |
| Final Conc (µg/mL)                  | 2 (kidney & ovary)<br>4 (testis)        |                                   |                                    |                                  |              |
| Dilution Factor                     | 1:100 (kidney & ovary)<br>1:50 (testis) |                                   |                                    |                                  |              |
| Clone                               | XMG1.2                                  | 11B11                             | FJK-16s                            | MP6-XT22                         | TC11-18H10.1 |
| Manufacturer                        | BioLegend                               | BioLegend                         | eBioscience                        | eBioscience                      | BioLegend    |
| Viability                           |                                         |                                   |                                    |                                  |              |
| Fluorochrome                        | Zombie UV                               |                                   |                                    |                                  |              |
| Dilution Factor                     | 1:200 (all tissues)                     |                                   |                                    |                                  |              |

|                     |           |
|---------------------|-----------|
| <b>Manufacturer</b> | BioLegend |
|---------------------|-----------|

Abbreviations: APC = allophycocyanin; BV = brilliant violet; FITC = fluorescein isothiocyanate; PE = phycoerythrin; PerCP-Cy7 = peridinin chlorophyll protein complex cyanine 7
